# Supplementary material
Source: HighWire-hosted journal article supplement (http://www.qdcxjkg.com/highwire/filestream/114000/field_highwire_adjunct_files/0/Supplement_1_ERJ_final_R1.pdf)
Supplement: Supplement_1_ERJ_final_R1.pdf [file Supplement_1_ERJ_final_R1.pdf]

# CLINICAL PHENOTYPES OF ITALIAN AND SPANISH PATIENTS WITH ALPHA-1-ANTITRYPSIN DEFICIENCY

**Authors:** Barbara Piras<sup>1</sup>, Ilaria Ferrarotti<sup>2</sup>, Beatriz Lara<sup>3</sup>, Maria Teresa Martinez<sup>4</sup>, Ana Bustamante<sup>5</sup>, Stefania Ottaviani<sup>2</sup>, Pietro Pirina<sup>1</sup>, Maurizio Luisetti<sup>2</sup>, Marc Miravittles<sup>6</sup>

**Center:**<sup>1</sup>Institute of Respiratory Diseases, Sassari University - Italy

<sup>2</sup> Centro per la Diagnosi del Deficit Ereditario di Alfa1-antitripsina, Dipartimento di Medicina Molecolare, SC Pneumologia, Fondazione IRCCS Policlinico S. Matteo, Università di Pavia, Italy

<sup>3</sup> Servei de Pneumologia, Hospital Universitari Arnau de Vilanova, Lleida, Spain.

<sup>4</sup>Servicio de Neumología. Hospital 12 de Octubre, Madrid, Spain

<sup>5</sup>Servicio de Neumología, Hospital Sierrallana, Torrelavega, Spain.

<sup>6</sup>Institut d'Investigacions Biomèdiques August Pi i Sunyer (IDIBAPS). Hospital Clínic. Ciber de Enfermedades Respiratorias (CIBERES). Barcelona, Spain.

## Supplementary material

**Table S1.** Rare genotypes identified in the Italian and Spanish registries of individuals with AAT deficiency

| Genotype          | Italy | Spain | Total |
|-------------------|-------|-------|-------|
| Mmalton/Mmalton   | 5     | 1     | 6     |
| Mprocida/Mprocida | 2     | 0     | 2     |
| I/Mprocida        | 1     | 0     | 1     |

|                       |    |    |    |
|-----------------------|----|----|----|
| Plowell/Q0mattawa     | 1  | 0  | 0  |
| Q0/Q0                 | 9  | 0  | 0  |
| S/S                   | 3  | 0  | 0  |
| S/Mmalton             | 4  | 0  | 0  |
| S/Plowell             | 2  | 0  | 0  |
| S/Mheerlen            | 1  | 0  | 0  |
| Z/Mmalton             | 10 | 3  | 13 |
| Z/Mprocida            | 8  | 0  | 8  |
| Z/I                   | 5  | 1  | 6  |
| Z/Mwurzburg           | 4  | 0  | 0  |
| Z/Plowell             | 2  | 0  | 0  |
| Z/Q0                  | 3  | 0  | 0  |
| Z/Mbrescia            | 1  | 0  | 0  |
| Z/Mpalermo            | 0  | 2  | 2  |
| Ybarcelona/Ybarcelona | 0  | 1  | 1  |
| Z/P                   | 0  | 1  | 1  |
| S/I                   | 0  | 2  | 2  |
| M/Q0bellingham        | 0  | 1  | 1  |
| Total                 | 61 | 12 | 73 |
